# Supplementary material for: Selective Ligand Recognition by a Diversity-Generating Retroelement Variable Protein
Source: PLOS journal article supplement (doi:10.1371/journal.pbio.0060131), 2008-05-28
Supplement: S1 (10.1371/journal.pbio.0060131.s001) [file journal.pbio.0060131.s001]

**Table S1. Data collection and refinement statistics (Molecular Replacement)**

|                                                                  | Mtd-P1•Prn-E <sup>a</sup>           |
|------------------------------------------------------------------|-------------------------------------|
| <b>Data collection</b>                                           |                                     |
| Space group                                                      | P6 <sub>1</sub>                     |
| Cell dimensions                                                  |                                     |
| <i>a</i> , <i>c</i> (Å)                                          | 413.5, 98.9                         |
| Resolution (Å)                                                   | 50.00-3.16 (3.26-3.16) <sup>b</sup> |
| <i>R</i> <sub>merge</sub> <sup>c</sup>                           | 15.6 (78.7)                         |
| <i>I</i> / $\sigma$ <i>I</i>                                     | 13.8 (2.0)                          |
| Completeness (%)                                                 | 100.0 (100.0)                       |
| Redundancy                                                       | 9.2 (8.3)                           |
| <b>Refinement</b>                                                |                                     |
| Resolution (Å)                                                   | 49.63-3.16 (3.24-3.16)              |
| No. reflections                                                  | 157,861                             |
| <i>R</i> <sub>work</sub> / <i>R</i> <sub>free</sub> <sup>d</sup> | 22.4 / 24.9 (33.0 / 36.0)           |
| No. atoms                                                        |                                     |
| Protein                                                          | 23,896                              |
| Ligand/ion                                                       | 4                                   |
| Water                                                            | 0                                   |
| <i>B</i> -factors (Å <sup>2</sup> )                              |                                     |
| Protein                                                          | 69.5                                |
| Ligand/ion                                                       | 52.3                                |
| Water                                                            | 0                                   |
| R.m.s. deviations                                                |                                     |
| Bond lengths (Å)                                                 | 0.008                               |
| Bond angles (°)                                                  | 1.141                               |
| Estimated coordinate error (Å) <sup>e</sup>                      | 0.312, 0.246                        |

<sup>a</sup>Data collected from single crystal.<sup>b</sup>Highest resolution shell is shown in parenthesis.

$$^cR_{\text{merge}} = 100 \times \frac{\sum_h \sum_i |I_{h,i} - I_h|}{\sum_h \sum_i I_{h,i}}, \text{ where } I_h \text{ is the mean intensity of symmetry-related reflections, } I_{h,i}.$$

$$^dR = 100 \times \frac{\sum_{hkl} |F_{\text{obs}} - F_{\text{calc}}|}{\sum_{hkl} F_{\text{obs}}}, \text{ where } R_{\text{free}} \text{ is calculated for a randomly chosen 5 \% of reflections (} F > 0 \text{)}$$

omitted from refinement, and *R*<sub>work</sub> is calculated for the remaining 95 % of reflections (*F* > 0) included in refinement.

<sup>e</sup>First value based on *R*<sub>free</sub>, and second on maximum likelihood.
