# Supplementary figures and images for: Selective Ligand Recognition by a Diversity-Generating Retroelement Variable Protein
Source: PLOS journal article supplement (doi:10.1371/journal.pbio.0060131), 2008-05-28

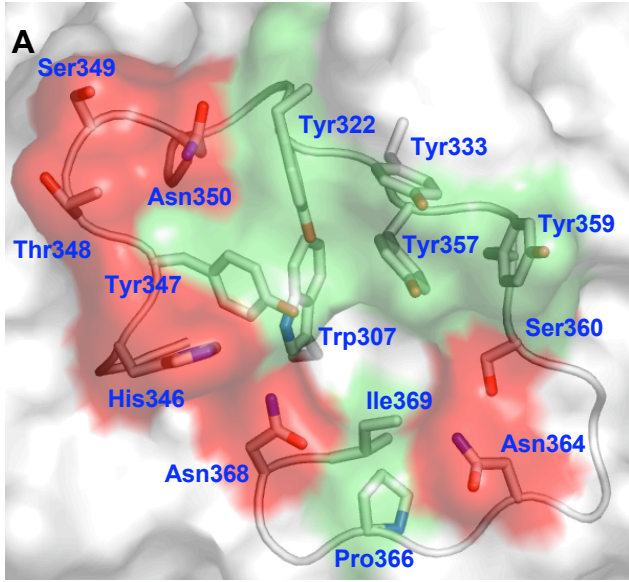

**Mtd-M1**

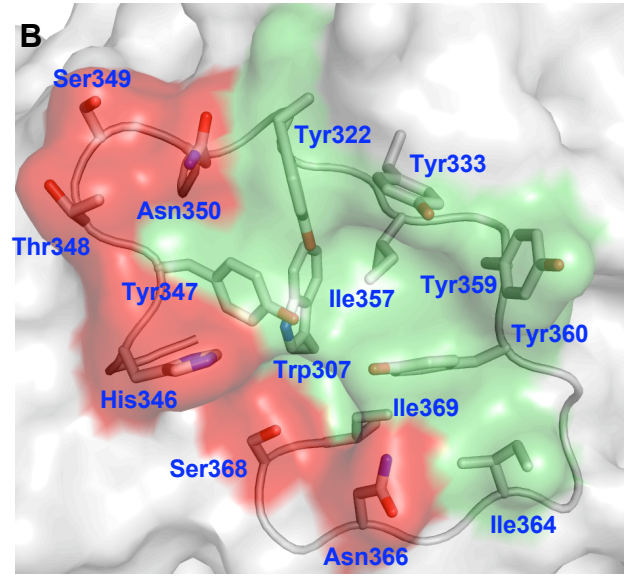

**Mtd-P6 (modeled)**

Supplement: S3 (10.1371/journal.pbio.0060131.s003) [file journal.pbio.0060131.s003]
